# Supplementary material for: Ratiometric detection of temperature using responsive dual-emissive MOF hybrids
Source: Royal Society of Chemistry journal article supplement (doi:10.1039/c5tc02004b), 2015-01-01
Supplement: c5tc02004b1.pdf [file c5tc02004b1.pdf]

## **SUPPORTING INFORMATION**

### **Ratiometric detection of temperature with responsive dual-emissive MOF hybrids**

You Zhou and Bing Yan\*

Shanghai Key Lab of Chemical Assessment and Sustainability, Department of Chemistry, Tongji University, Siping Road 1239, Shanghai 200092, China.

E-mail: byan@tongji.edu.cn.

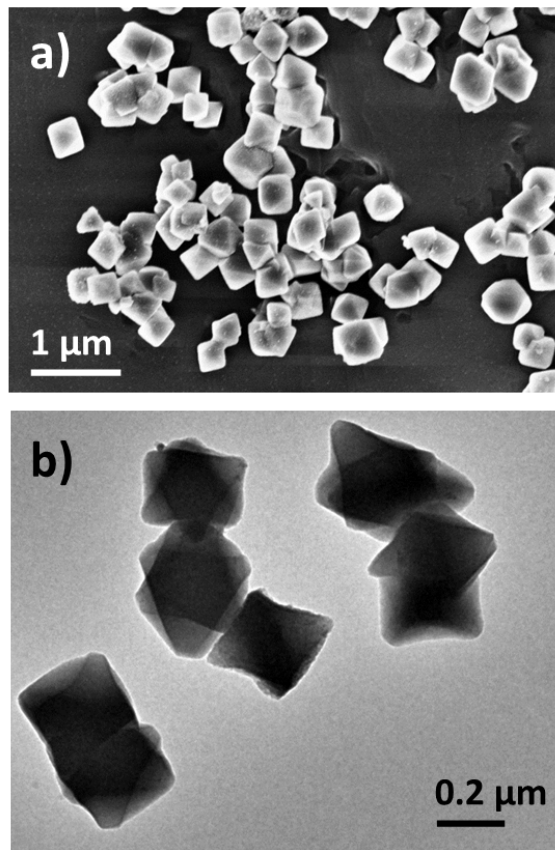

**Figure S1.** Typical SEM (a) and TEM (b) images of UiO-bpydc.

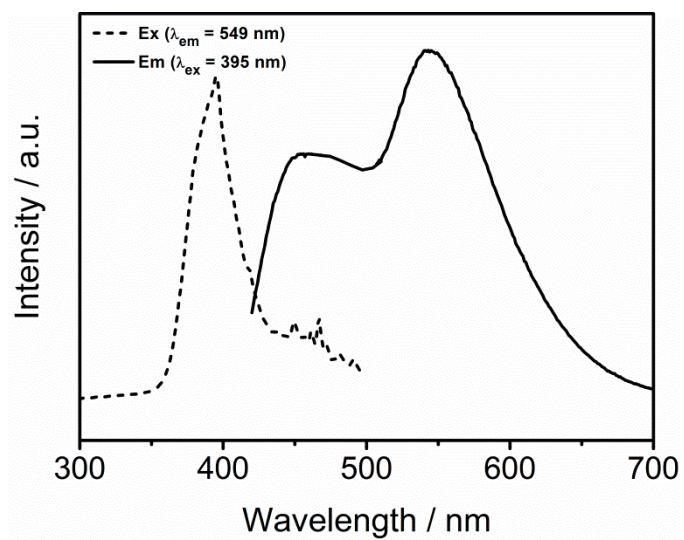

**Figure S2.** Excitation (dash line) and emission (solid line) spectra of  $\text{H}_2\text{bpydc}$  ligand.

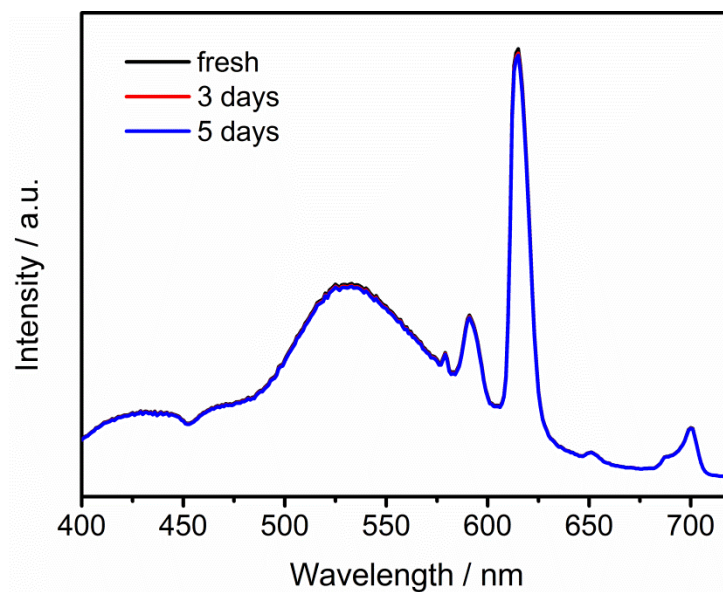

**Figure S3.** Day-to day fluorescence stability of  $\text{Eu}^{3+}$ @UiO-Bpydc solid in air.

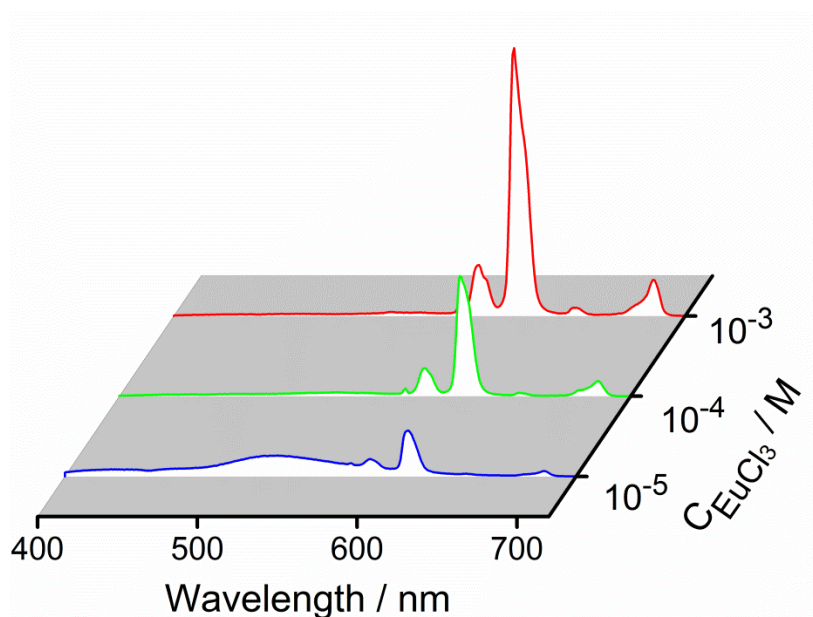

**Figure S4.** Emission spectra ( $\lambda_{\text{ex}} = 340 \text{ nm}$ ) of  $\text{Eu}^{3+}$ @UiO-bpydc products resulting from feeding  $\text{EuCl}_3$  solution with concentrations in the range of  $10^{-5}$ - $10^{-3} \text{ mol L}^{-1}$ .

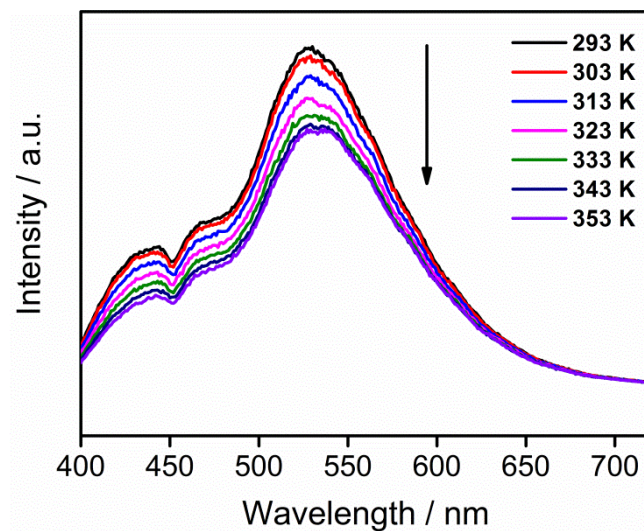

**Figure S5.** Temperature-dependent emission spectra ( $\lambda_{\text{ex}} = 368 \text{ nm}$ ) of UiO-bpydc.

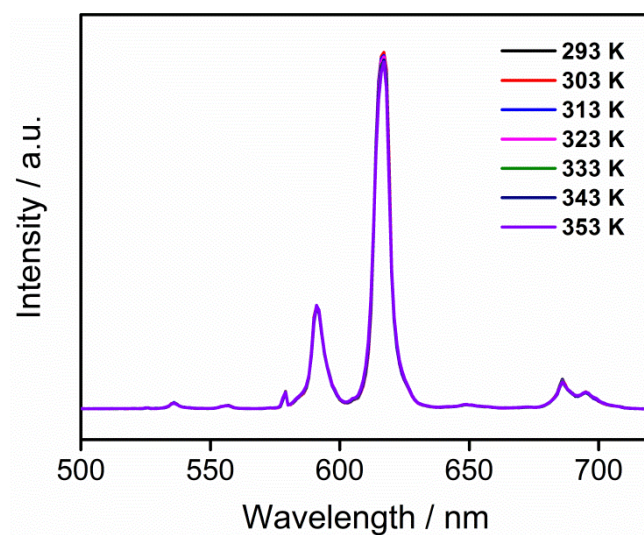

**Figure S6.** Temperature-dependent emission spectra ( $\lambda_{\text{ex}} = 395 \text{ nm}$ ) of  $\text{EuCl}_3$ .

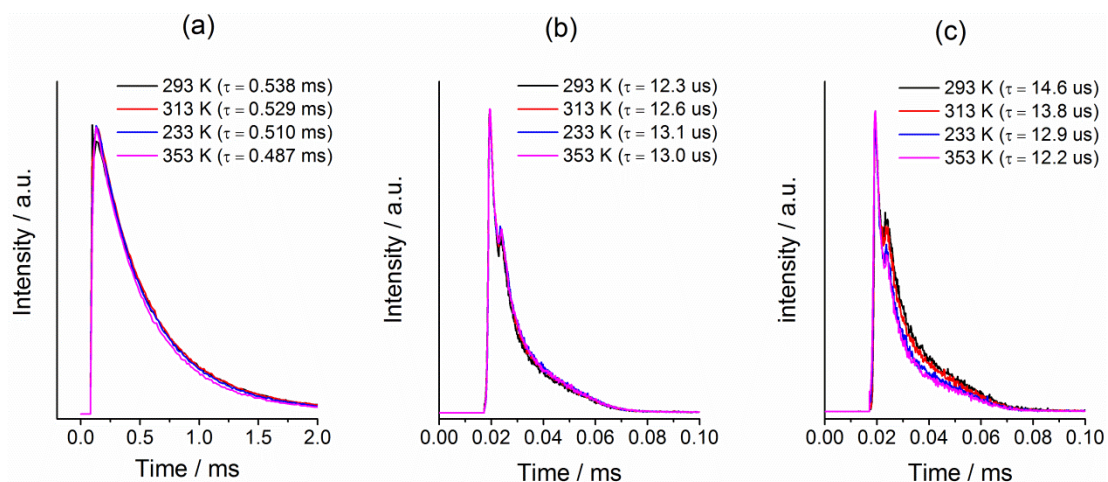

**Figure S7.** The luminescence decay times of  $\text{Eu}^{3+}$  (a) and bpydc emission (b) in  $\text{Eu}^{3+}@UiO\text{-bpydc}$  composite, and bpydc emission in UiO-bpydc (c).

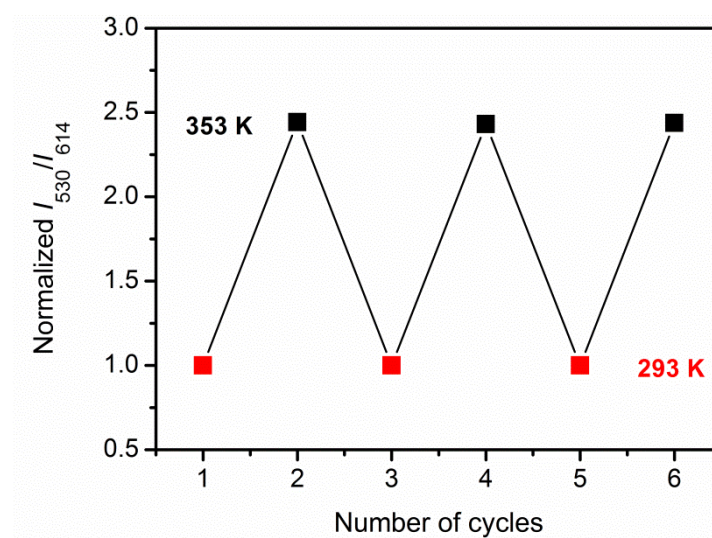

**Figure S8.** The reversible changes of the normalized emission intensity ratio ( $I_{530}/I_{614}$ ) of  $\text{Eu}^{3+}@UiO\text{-bpydc}$  composite by the alternative thermo-cycles in the range of 293 (red squares) and 353 K (black squares).

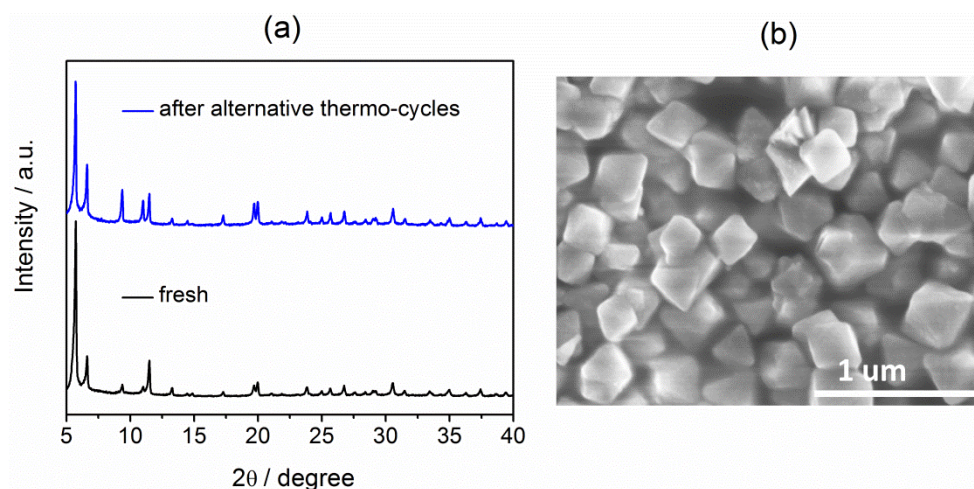

**Figure S9.** a) The PXRD patterns of fresh  $\text{Eu}^{3+}@ \text{UiO-bpydc}$  composites. The black and blue line represents the fresh one and that after alternative thermos-cycles (293-353 K), respectively. b) The typical SEM image of  $\text{Eu}^{3+}@ \text{UiO-bpydc}$  after alternative thermos-cycles (293-353 K).

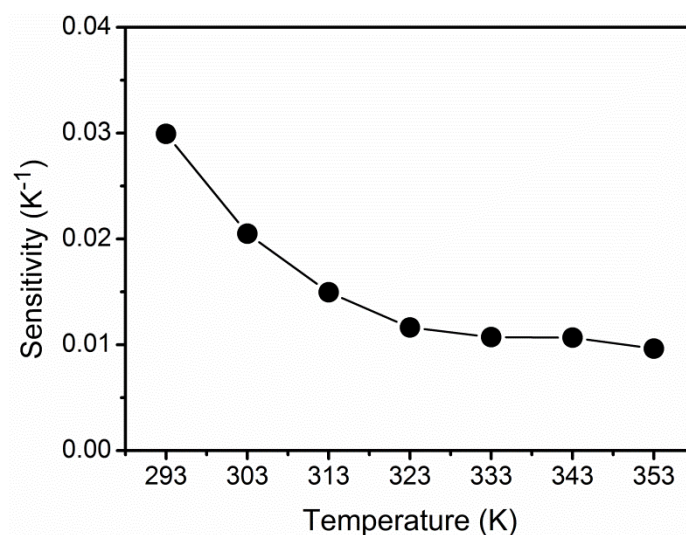

**Figure S10.** The thermometric sensitivity of  $\text{Eu}^{3+}@ \text{UiO-bpydc}$  as a function of temperature.

**Table S1** Comparison of sensitivity of other reported MOF ratiometric thermometers with ours. Materials, the temperature ranges of operation ( $\Delta T$ ), maximum relative sensitivity values ( $S_m$ ).

| Materials <sup>a</sup>                                                                                                                    | $\Delta T$ (K) | $S_m$ (% K <sup>-1</sup> ) |
|-------------------------------------------------------------------------------------------------------------------------------------------|----------------|----------------------------|
| Eu <sub>0.0069</sub> Tb <sub>0.9931</sub> DMBDC <sup>1</sup>                                                                              | 50-200         | 1.15                       |
| Tb <sub>0.9</sub> Eu <sub>0.1</sub> PIA <sup>2</sup>                                                                                      | 100-300        | 3.27                       |
| Tb <sub>0.957</sub> Eu <sub>0.043</sub> cpda <sup>3</sup>                                                                                 | 40-300         | 16                         |
| Tb <sub>0.99</sub> Eu <sub>0.01</sub> (BDC) <sub>1.5</sub> (H <sub>2</sub> O) <sub>2</sub> <sup>4</sup>                                   | 290-320        | 0.31                       |
| Eu <sub>0.005</sub> /Tb <sub>0.995</sub> @In(OH)(bpydc) <sup>5</sup>                                                                      | 283-333        | 2.81                       |
| [Eu <sub>0.7</sub> Tb <sub>0.3</sub> (cam)(Himdc) <sub>2</sub> (H <sub>2</sub> O) <sub>2</sub> ] <sub>3</sub> <sup>6</sup>                | 100-450        | 0.11                       |
| Tb <sub>0.98</sub> Eu <sub>0.02</sub> (BDC) <sub>0.5</sub> (DSTP)] <sub>2</sub> H <sub>2</sub> O <sup>7</sup>                             | 77-225         | 2.75                       |
| ZJU-88 $\Rightarrow$ perylene <sup>8</sup>                                                                                                | 293-353        | 1.28                       |
| (Tb <sub>0.914</sub> Eu <sub>0.086</sub> ) <sub>2</sub> (PDA) <sub>3</sub> (H <sub>2</sub> ) <sub>2</sub> ·2H <sub>2</sub> O <sup>9</sup> | 10-325         | 5.96                       |
| Eu <sup>3+</sup> @UiO-bpydc                                                                                                               | 293-353        | 2.99                       |

<sup>a</sup> Corresponding references.

## REFERENCES

1. Y. J. Cui, H. Xu, Y. F. Yue, Z. Y. Guo, J. C. Yu, Z. X. Chen, J. K. Gao, Y. Yang, G. D. Qian and B. L. Chen, *J. Am. Chem. Soc.*, 2012, **134**, 3979.
2. X. T. Rao, T. Song, J. K. Gao, Y. J. Cui, Y. Yang, C. D. Wu, B. L. Chen and G. D. Qian, *J. Am. Chem. Soc.*, 2013, **135**, 15559.
3. Y. J. Cui, W. F. Zou, R. J. Song, J. C. Yu, W. Q. Zhang, Y. Yang and G. D. Qian, *Chem. Commun.*, 2014, **50**, 719.
4. A. Cadiau, C. D. S. Brites, P. M. F. J. Costa, R. A. S. Ferreira, J. Rocha and L. D. Carlos, *ACS Nano*, 2013, **7**, 7213.
5. Y. Zhou, B. Yan and F. Lei, *Chem. Commun.*, 2014, **50**, 15235.
6. Y. Q. Wei, R. J. Sa, Q. H. Li and K. C. Wu, *Dalton Trans.*, 2015, **44**, 3067.
7. Y. H. Han, C. B. Tian, Q. H. Li and S. W. Du, *J. Mater. Chem. C*, 2014, **2**, 8065.
8. Y. J. Cui, R. J. Song, J. C. Yu, M. Liu., Z. Q. Wang, C. D. Wu, Y. Yang, Z. Y Wang, B. L. Chen and G. D. Qian, *Adv. Mater.*, 2015, **27**, 1420.
9. Z. P. Wang, D. Ananias, A. Carne-Sanchez, C. D. S. Brites, I. Imaz, D. MasPOCH, J. Rocha and L. D. Carlos, *Adv. Funct. Mater.*, 2015, **25**, 2824
